# Supplementary material
Source: Royal Society of Chemistry journal article supplement (doi:10.1039/d6qi00339g)
Supplement: d6qi00339g1.pdf [file d6qi00339g1.pdf]

## Supplementary Information

### **Nickel(II) porphyrin/fullerene C<sub>70</sub> porous molecular cocrystal featuring a robust one-dimensional channel**

Nobuhiro Sato,<sup>a</sup> Kosuke Toki,<sup>a</sup> Tomoki Tateishi,<sup>a,b</sup> Masaya Tsumura,<sup>c</sup> Ryojun Toyoda,<sup>a</sup> Shinya Takaishi,<sup>a</sup> Yuki Kurashige,<sup>b</sup> Kunihisa Sugimoto,<sup>d</sup> and Ryota Sakamoto<sup>\*a,e</sup>

a. Department of Chemistry, Graduate School of Science, Tohoku University, 6-3 Aramaki Aza-Aoba, Aoba-ku, Sendai 980-8578, Japan.

b. Frontier Research Institute for Interdisciplinary Sciences (FRIS), Tohoku University Aramaki aza Aoba 6-3, Aoba-ku, Sendai 980-8578, Japan.

c. Department of Chemistry, Graduate School of Science, Kyoto University, Kitashirakawa Oiwake-cho, Sakyo-ku, Kyoto, Japan.

d. Department of Chemistry, Kindai University, 3-4-1 Kowakae, Higashi-Osaka, Osaka 577-8502, Japan.

e. Division for the Establishment of Frontier Sciences of Organization for Advanced Studies at Tohoku University, 2-1-1 Katahira, Aoba-ku, Sendai 980-8577, Japan.

## Materials, characterization and calculation methods

All chemicals were purchased from commercial suppliers, and they were used without further purification unless otherwise noted. The diffraction data for all crystals were mounted on a cryoloop and placed in the nitrogen stream ( $T = 120$  or  $300$  K) and collected on a Rigaku XtaLAB AFC10 diffractometer with a HyPix-6000HE hybrid pixel array detector, graphite monochromated Mo  $K\alpha$  radiation ( $\lambda = 0.7107$  Å) and a cryogenic equipment GN-2D/S. The crystal structures were solved using direct methods (SHELXT) followed by Fourier synthesis. Structure refinement was performed using full matrix least-squares procedures with SHELXL on F2 in the Olex2 software. CCDC 2527177 - 2527179 contain the supplementary crystallographic data for this paper. These data can be obtained free of charge via [www.ccdc.cam.ac.uk/data\\_request/cif](http://www.ccdc.cam.ac.uk/data_request/cif). Void calculation was performed using Mercury software. The hydrogen atoms were generated by geometrical considerations, constrained by idealized geometries and allowed to ride on their carrier atoms with an isotropic displacement parameter related to the equivalent displacement parameter of their carrier atoms. The high-pressure single crystal diffraction data experiments were conducted at  $300$  K with radiation wavelength of  $\lambda = 0.4135$  Å, at SPring-8, BL02B1 beamline. A single crystal of the sample and small amount of ruby powder was placed in a Diamond Anvil Cell (DAC) with Fluorinert 43 as the pressure transmitting medium. The pressure inside the DAC chamber was determined using the ruby fluorescence method. The diffraction frames were collected on a Pilatus 1M CdTe detector. Lattice parameters were obtained with CrysAlisPro software.<sup>1</sup> UV-vis-NIR diffuse reflectance spectra were collected on a Shimadzu UV-3100PC spectrometer attached with a Shimadzu ISR-3100 integrating sphere. For solid-state UV, BaSO<sub>4</sub> was used as a nonabsorbing matrix to dilute the sample. Obtained diffuse reflectance spectra were converted into absorption spectra by applying the Kubelka-Munk function  $F(R) = (1 - R)^2/2R$ . Gas sorption measurement was performed by Belsorp-max. N<sub>2</sub> sorption data was analyzed using BELmasterTM. Powder X-ray diffraction (PXRD) patterns were collected on a Rigaku Smartlab© with Cu  $K\alpha$  radiation ( $\lambda = 1.5406$  Å) at room temperature. FT-IR spectra were acquired using a Jasco FT/IR-4200 spectrometer. Therein, an attenuated total refraction (ATR) attachment with a ZnSe window was used. The structures of porphyrin-fullerene cocrystals (NiTEPP/C<sub>60</sub>, three types of disordered NiTEPP/C<sub>70</sub>, and NiTEPP/C<sub>70-n</sub>) were optimized using the Gaussian Plane Wave (GPW) method<sup>2</sup> implemented in CP2K program.<sup>3</sup> Initially, a unit cell containing four fullerenes was constructed from the crystal structure at  $120$  K, and the geometry and lattice constants optimization was performed. To evaluate the intermolecular interaction energy, the NiTEPP framework and the single fullerene molecule were extracted from the optimized unit cell, and their energies were calculated separately. The interaction energy  $\Delta E$  was defined as follows:

$$\Delta E = E(\text{cocrystal}) - E(\text{NiTEPP framework}) - 4 \times E(\text{fullerene molecule})$$

The Perdew-Burke-Ernzerhof (PBE) functional<sup>4</sup>, the DZVP-MOLOPT-SR-GTH basis set<sup>5</sup>, and GTH-PBE pseudopotentials<sup>6</sup> were employed with DFT-D3(BJ) dispersion correction<sup>7</sup> to account for van der

Waals interaction. The planewave cutoff energy was set to 320 Ry with a relative cutoff 30 Ry. The  $k$ -point mesh was set to  $1 \times 1 \times 1$ , or  $\Gamma$  point only. The optimization was terminated when the maximum and the root mean square of the force got lower than  $1.0 \times 10^{-3}$  a.u.

### Single-crystal preparation for NiTEPP/C<sub>70</sub>, NiTEPP/C<sub>70</sub>-n

NiTEPP was synthesized according to a previously reported procedure<sup>8-10</sup>. NiTEPP (1.7 mg, 2.2 mmol) and C<sub>70</sub> (1.2 mg, 1.8 mmol) were dissolved in 2.0 mL of a CHCl<sub>3</sub> / CS<sub>2</sub> mixed solvent (1:1, v/v). The resulting solution was placed in a vial, which was then set inside a larger vial containing hexane as poor solvent, with the liquid levels of the inner and outer vials adjusted to be the same (Figure S1). After 1–2 weeks, the resulting crystals were collected by filtration.

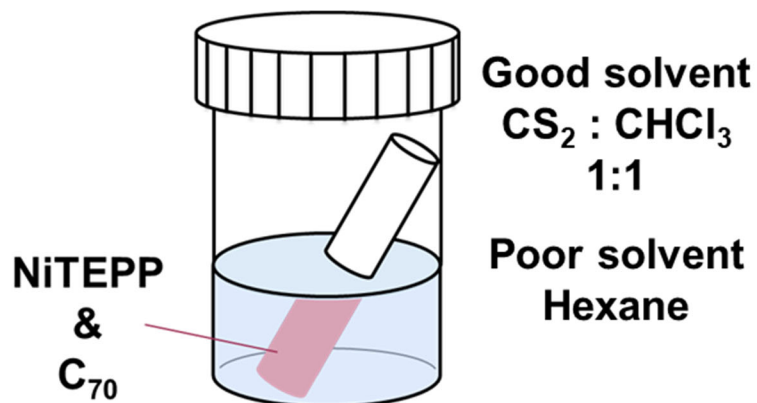

**Fig. S1.** Schematic illustration of the synthesis of NiTEPP/C<sub>70</sub> and NiTEPP/C<sub>70</sub>-n.

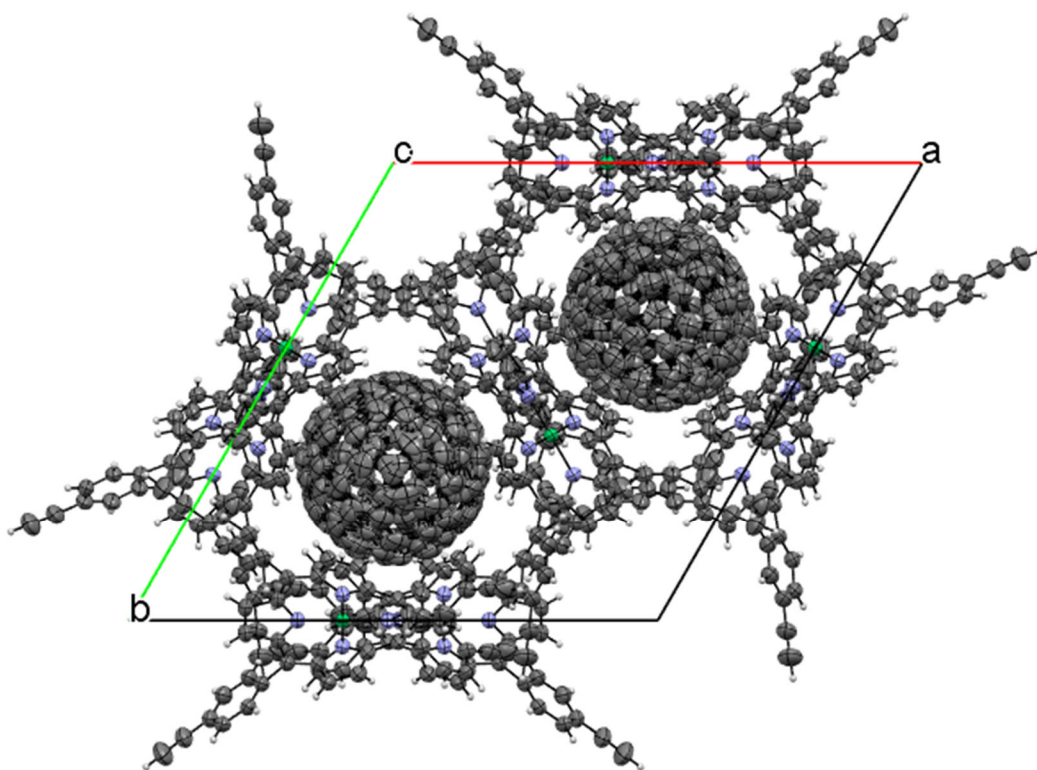

**Fig. S2.** Unit cell of NiTEPP/C<sub>70</sub> viewed along the *c* axis.

Table S1. Crystallographic data for NiTEPP/C<sub>70</sub> collected at 120 K

|                                                |                                                                |
|------------------------------------------------|----------------------------------------------------------------|
| Identification code                            | NiTEPP/C <sub>70</sub>                                         |
| Empirical formula                              | C <sub>98.67</sub> H <sub>28</sub> N <sub>4</sub> Ni           |
| Formula weight                                 | 1327.96                                                        |
| Temperature/ K                                 | 120                                                            |
| Crystal system                                 | trigonal                                                       |
| Space group                                    | $P\bar{3}c1$                                                   |
| $a / \text{Å}$                                 | 22.4788(6)                                                     |
| $b / \text{Å}$                                 | 22.4788(6)                                                     |
| $c / \text{Å}$                                 | 22.3082(10)                                                    |
| $\alpha / ^\circ$                              | 90                                                             |
| $\beta / ^\circ$                               | 90                                                             |
| $\gamma / ^\circ$                              | 120                                                            |
| Volume / $\text{Å}^3$                          | 9762.1(7)                                                      |
| $Z$                                            | 6                                                              |
| $\rho_{\text{calc}} \text{ g/cm}^3$            | 1.355                                                          |
| $\mu / \text{mm}^{-1}$                         | 0.357                                                          |
| $F(000)$                                       | 4056.0                                                         |
| Crystal size / $\text{mm}^3$                   | $0.35 \times 0.2 \times 0.18$                                  |
| Radiation                                      | Mo K $\alpha$ ( $\lambda = 0.71073$ )                          |
| $2\theta$ range for data collection / $^\circ$ | 5.146 to 67.502                                                |
| Index ranges                                   | $-34 \leq h \leq 29, -28 \leq k \leq 34, -34 \leq l \leq 34$   |
| Reflections collected                          | 136768                                                         |
| Independent reflections                        | 12185 [ $R_{\text{int}} = 0.0871, R_{\text{sigma}} = 0.0525$ ] |
| Data/restraints/parameters                     | 12185/0/473                                                    |
| Goodness-of-fit on $F^2$                       | 1.022                                                          |
| Final $R$ indexes [ $I \geq 2\sigma(I)$ ]      | $R_1 = 0.1204, wR_2 = 0.2779$                                  |
| Final $R$ indexes [all data]                   | $R_1 = 0.2050, wR_2 = 0.3250$                                  |
| Largest diff. peak/hole / $e \text{ Å}^{-3}$   | 0.85/-0.63                                                     |

### Disorder treatment of the C<sub>70</sub> unit in NiTEPP/C<sub>70</sub>

The space group of NiTEPP/C<sub>70</sub> is  $P\bar{3}c1$ . Unlike C<sub>60</sub>, the C<sub>70</sub> molecule does not possess threefold rotational symmetry, and therefore a fully ordered C<sub>70</sub> molecule cannot be placed on a crystallographic threefold axis without introducing inconsistencies in the structural model. Since the crystal structure is generated by applying symmetry operations to the asymmetric unit, the presence of a molecule lacking the corresponding symmetry inevitably results in orientational disorder.

Accordingly, the C<sub>70</sub> molecule was modeled as a symmetry-related disorder with an occupancy of 1/3 in the asymmetric unit. In this model, three equivalent orientations generated by the crystallographic threefold axis collectively correspond to one C<sub>70</sub> molecule.

During refinement using Olex2, a C<sub>70</sub> fragment was selected from the Fragment Database and positioned to match the Q peaks attributed to C<sub>70</sub>, as shown in **Figure S3**. The chemical occupancy was fixed at 1/3, and the PART instruction was set to -1. Upon refinement, three symmetry-related C<sub>70</sub> orientations were generated, resulting in an overall occupancy equivalent to one C<sub>70</sub> molecule.

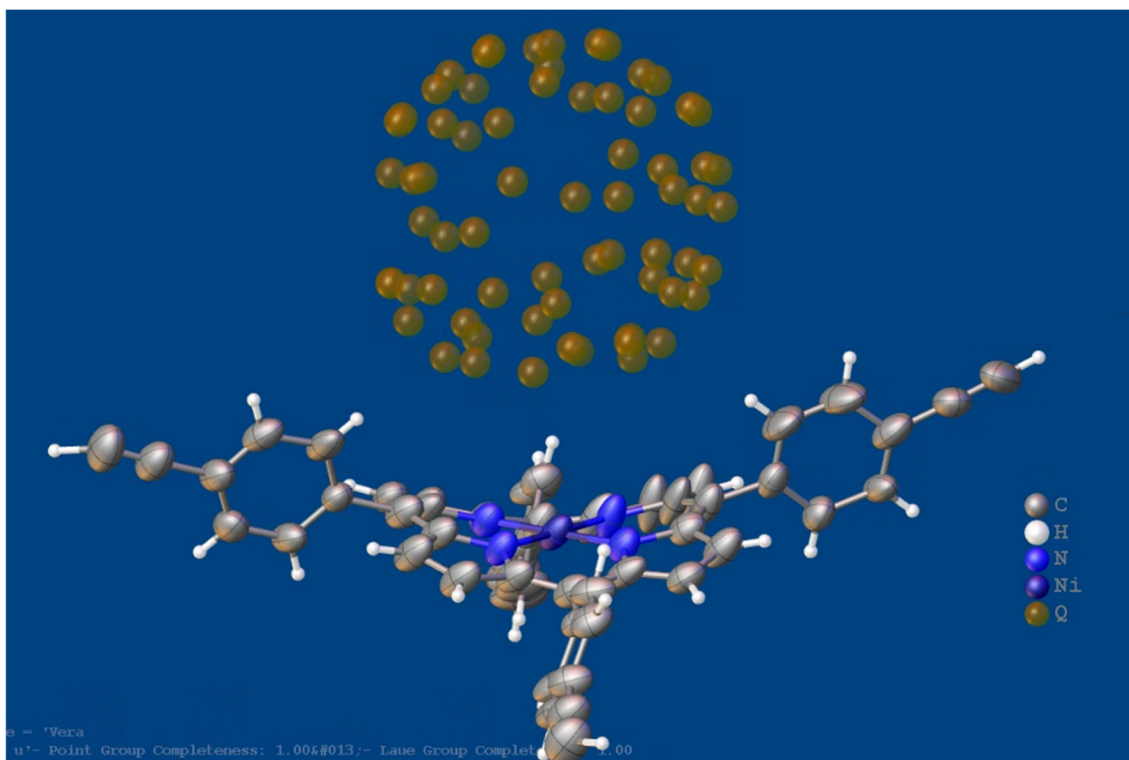

**Fig. S3.** Screenshot of the Olex2 interface during the structure refinement of NiTEPP/C<sub>70</sub>.

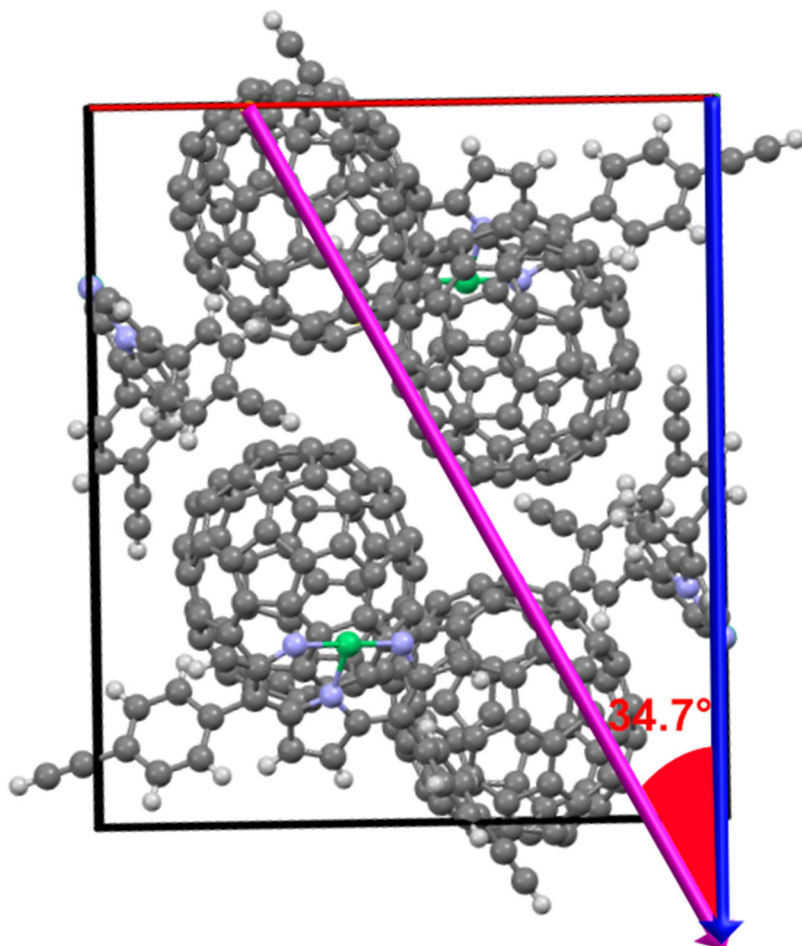

**Fig. S4.** Illustration showing the orientation of the fullerene molecules in **NiTEPP/C<sub>70</sub>**. Some atoms are omitted for clarity. The pink arrows indicate the long axis of C<sub>70</sub>, while the blue arrows represent the crystallographic *c* axis.

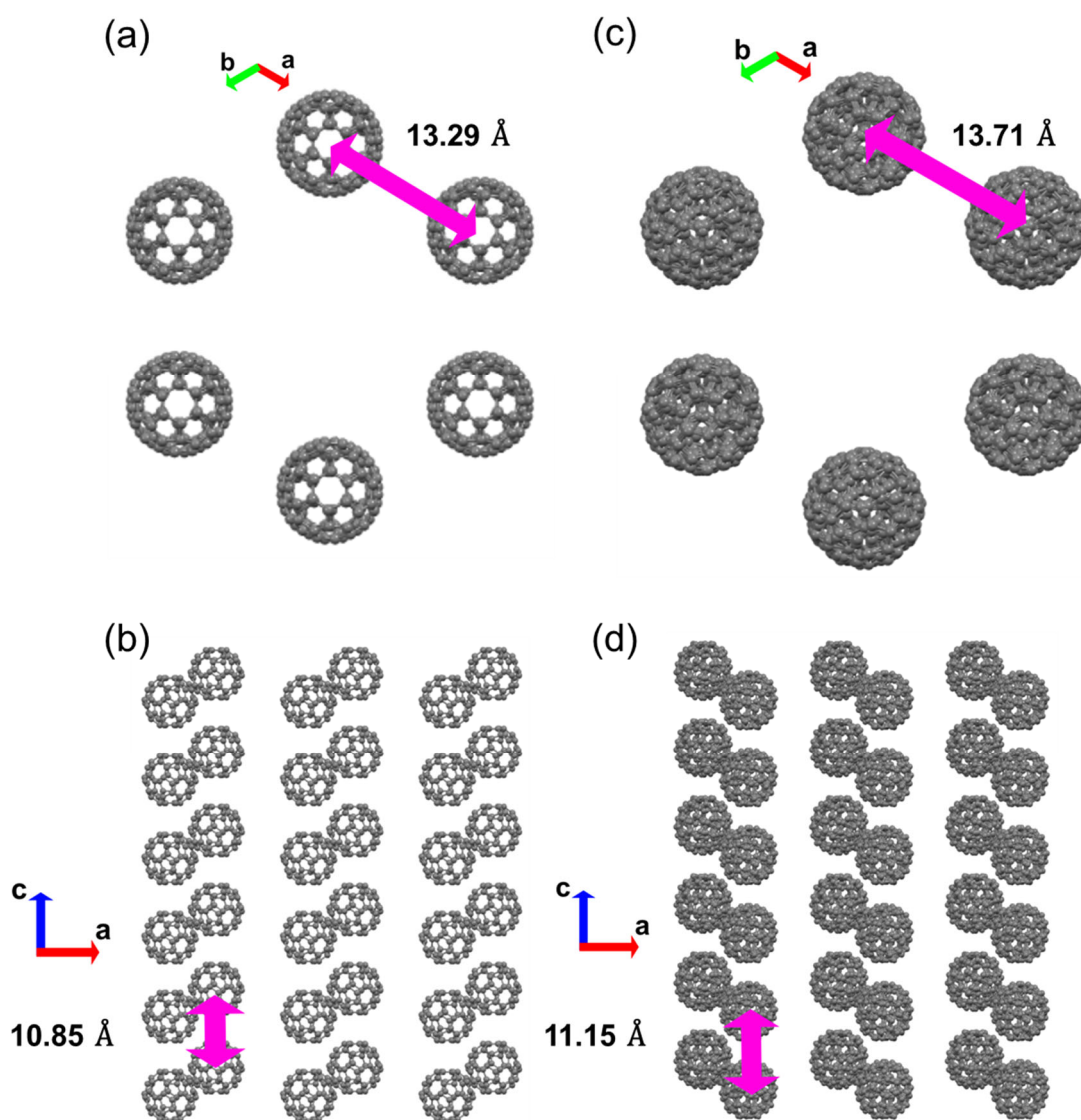

**Fig. S5.** Distances between the centroids of neighboring fullerene molecules the *a*, *b* network directions and *c* axis direction. Porphyrin molecules are omitted for clarity. (a). Crystal structure of NiTEPP/C<sub>60</sub> viewed along the *c* axis. (b). Crystal structure of NiTEPP/C<sub>60</sub> viewed along the *b* axis. (c) Crystal structure of NiTEPP/C<sub>70</sub> viewed along the *c* axis. (d) Crystal structure of NiTEPP/C<sub>70</sub> viewed along the *b* axis.

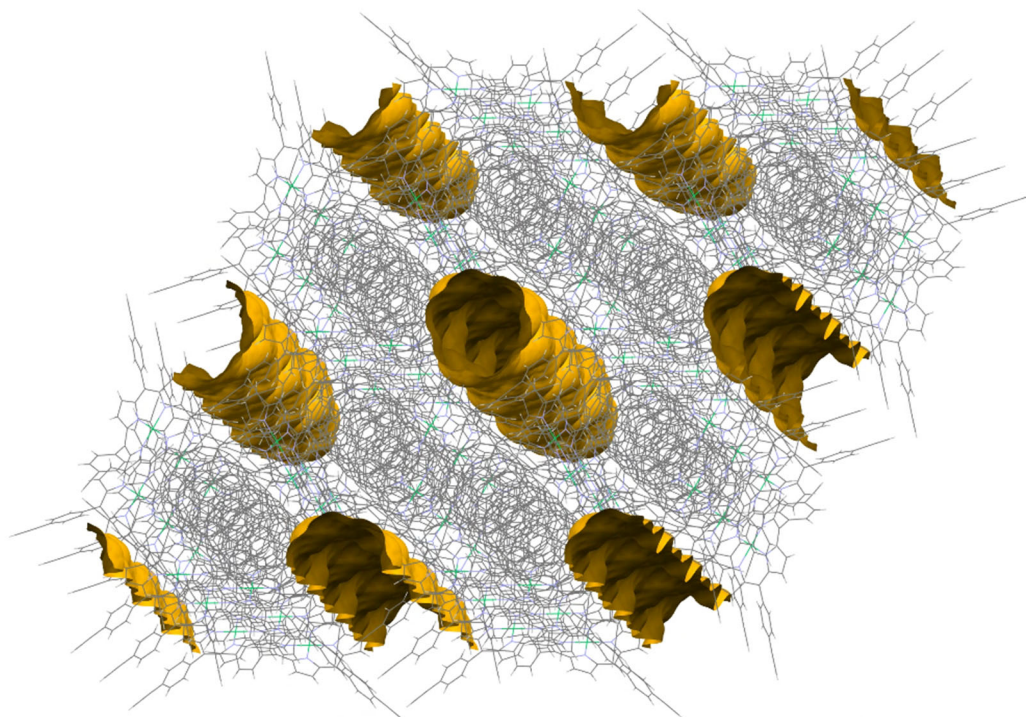

**Fig. S6.** Void representation of NiTEPP/C<sub>60</sub>, generated using the void calculation function implemented in the Mercury software. Atom colors: Ni (yellow green), N (light blue), C (gray), and H (white).

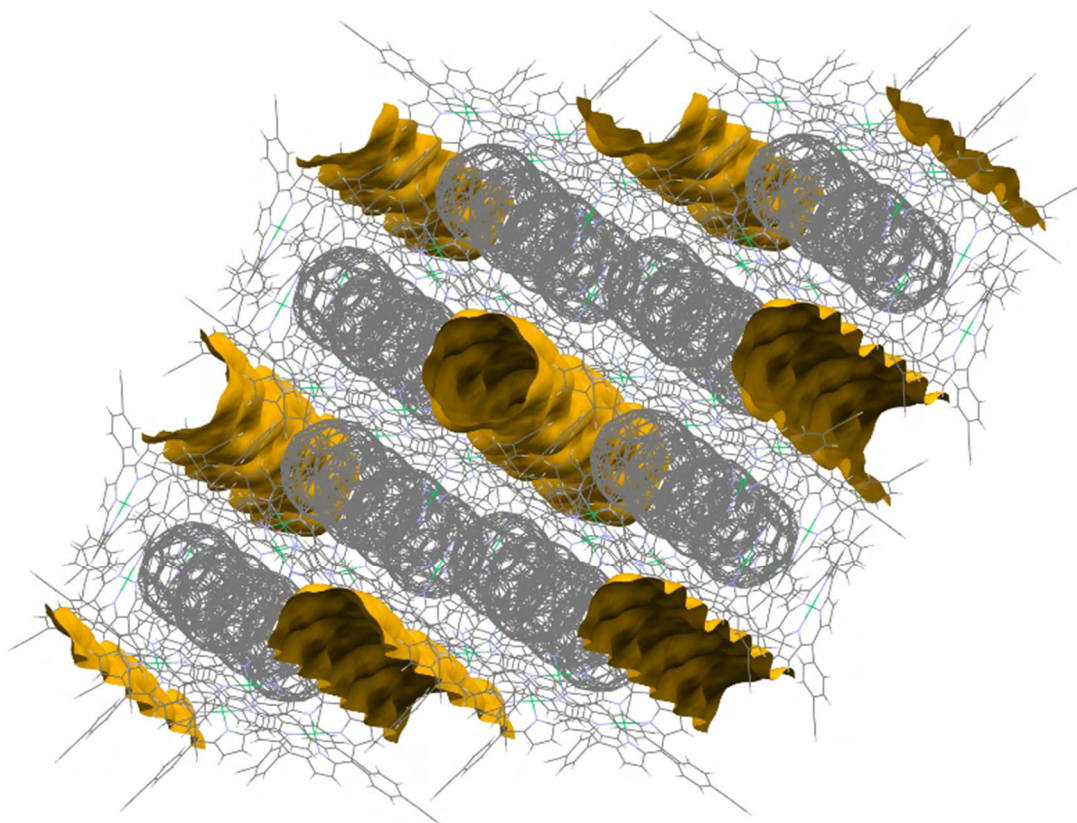

**Fig. S7.** Void representation of NiTEPP/C<sub>70</sub>, generated using the void calculation function implemented in the Mercury software. Atom colors: Ni (yellow green), N (light blue), C (gray), and H (white).

### Calculation of the void radius of NiTEPP/C<sub>70</sub>

The crystal structures were visualized using Mercury software. When viewed along the c axis in the space-filling representation, the centroid of the three hydrogen atoms (highlighted in yellow) that are most exposed toward the void was identified (**Figure S9**). Owing to crystallographic symmetry, these three hydrogen atoms lie on the same plane, and accordingly, their centroid is also located on this plane. The distance from this centroid to each hydrogen atom was measured (**Figure S10**), and the smallest of these distances was taken as the minimum radius from the center of the void to the surrounding atoms. From the measured value, the van der Waals radius of hydrogen (0.60 Å) was subtracted to obtain the effective void radius.<sup>2</sup> The same procedure was applied to NiTEPP/C<sub>70</sub>.

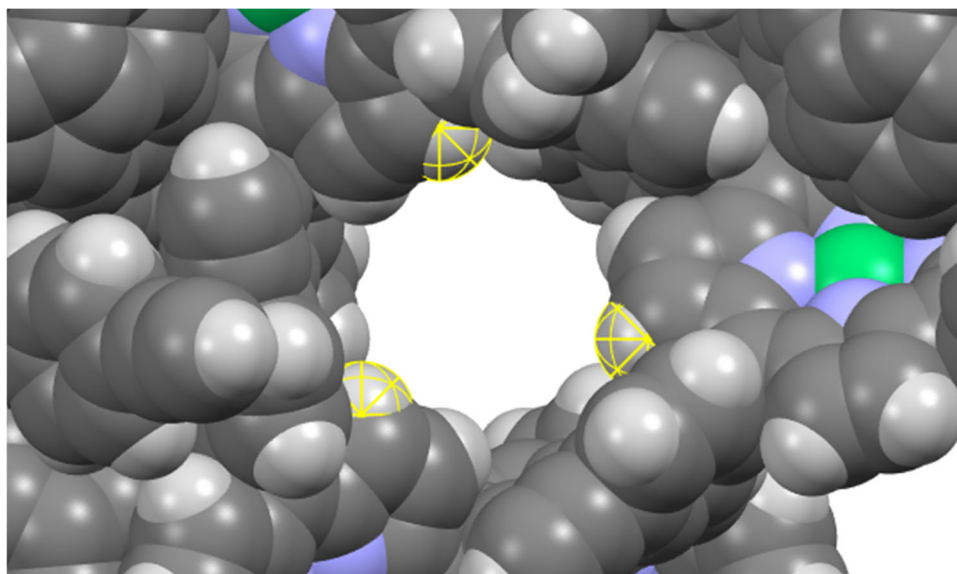

**Fig. S8.** Space-filling representation of NiTEPP/C<sub>60</sub> at 120 K. Atom colors: Ni (yellow green), N (light blue), C (gray), and H (white).

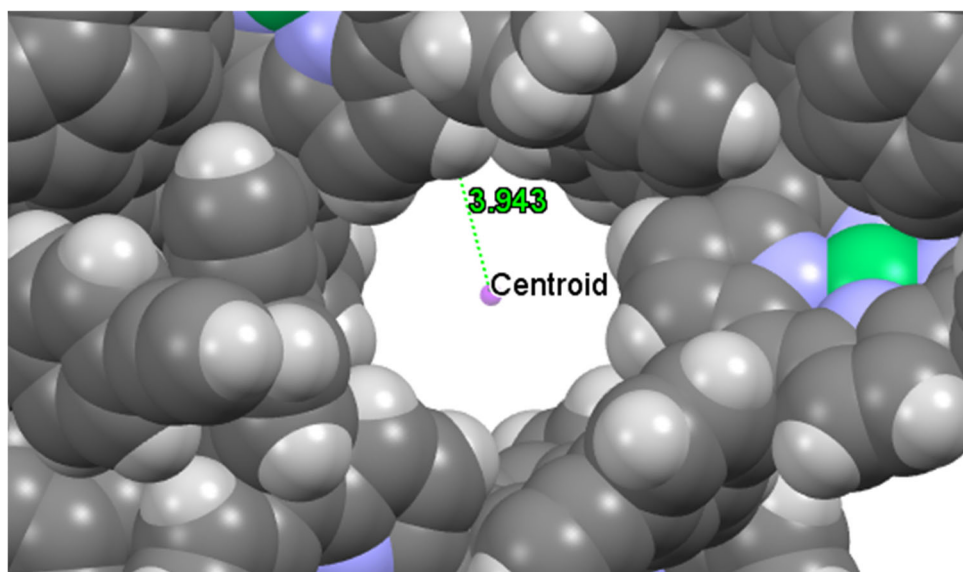

**Fig. S9.** Space-filling representation of NiTEPP/C<sub>60</sub> at 120 K, highlighting the centroid of the hydrogen atoms selected in Figure S9. Atom colors: Ni (yellow green), N (light blue), C (gray), and H (white).

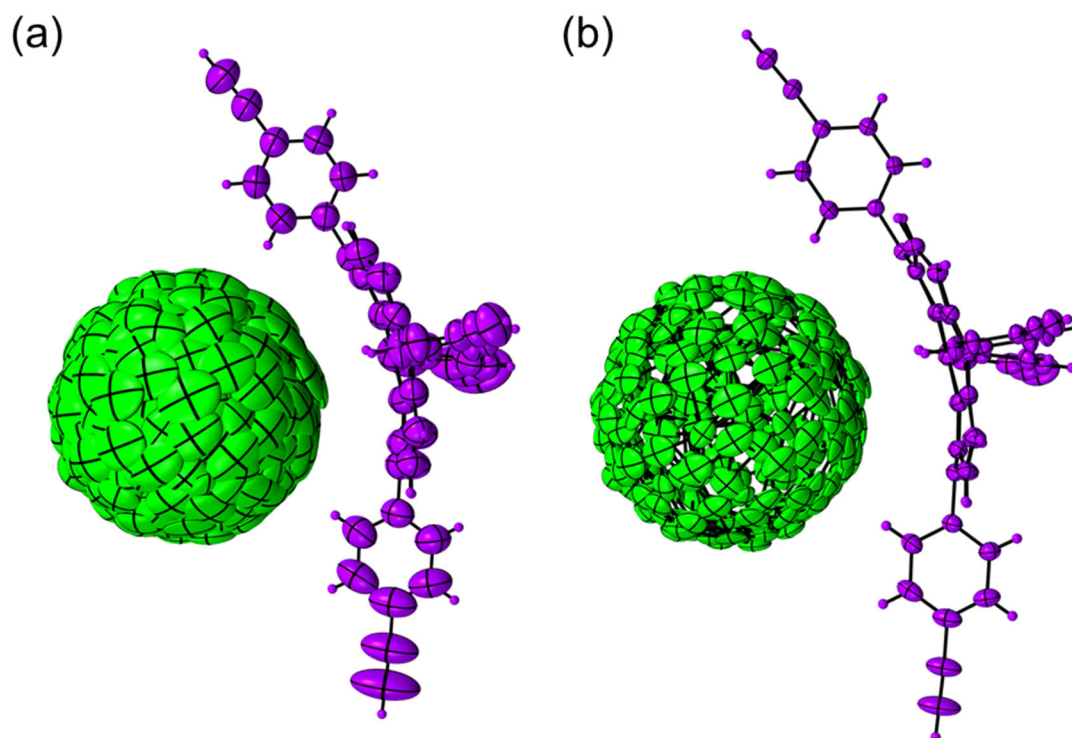

**Fig. S10.** ORTEP drawing of NiTEPP/C<sub>70</sub> at 293 K. (a) Thermal ellipsoids are drawn at the 50% probability level. The carbon atoms of the C<sub>70</sub> molecules exhibit severe disorder, effectively enveloping the outer region. (b) Thermal ellipsoids are drawn at the 15% probability level. NiTEPP molecules are shown in purple, and C<sub>70</sub> molecules in green.

**Table S2.** Crystallographic data for NiTEPP/C<sub>70</sub> collected at 293 K

|                                                |                                                                |
|------------------------------------------------|----------------------------------------------------------------|
| Identification code                            | NiTEPP/C <sub>70</sub>                                         |
| Empirical formula                              | C <sub>98.67</sub> H <sub>28</sub> N <sub>4</sub> Ni           |
| Formula weight                                 | 1327.96                                                        |
| Temperature/ K                                 | 293                                                            |
| Crystal system                                 | trigonal                                                       |
| Space group                                    | $P\bar{3}c1$                                                   |
| $a / \text{\AA}$                               | 23.0532(7)                                                     |
| $b / \text{\AA}$                               | 23.0532(7)                                                     |
| $c / \text{\AA}$                               | 21.9053(7)                                                     |
| $\alpha / ^\circ$                              | 90                                                             |
| $\beta / ^\circ$                               | 90                                                             |
| $\gamma / ^\circ$                              | 120                                                            |
| Volume / $\text{\AA}^3$                        | 10081.9(7)                                                     |
| $Z$                                            | 6                                                              |
| $\rho_{\text{calc}} \text{ g/cm}^3$            | 1.312                                                          |
| $\mu / \text{mm}^{-1}$                         | 0.345                                                          |
| $F(000)$                                       | 4056.0                                                         |
| Crystal size / $\text{mm}^3$                   | $0.14 \times 0.13 \times 0.12$                                 |
| Radiation                                      | Mo $K\alpha$ ( $\lambda = 0.71073$ )                           |
| $2\theta$ range for data collection / $^\circ$ | 5.130 to 67.396                                                |
| Index ranges                                   | $-32 \leq h \leq 34, -34 \leq k \leq 33, -25 \leq l \leq 33$   |
| Reflections collected                          | 128932                                                         |
| Independent reflections                        | 11990 [ $R_{\text{int}} = 0.0755, R_{\text{sigma}} = 0.1070$ ] |
| Data/restraints/parameters                     | 11990/7523/892                                                 |
| Goodness-of-fit on $F^2$                       | 1.005                                                          |
| Final $R$ indexes [ $I \geq 2\sigma(I)$ ]      | $R_1 = 0.0838, wR_2 = 0.1675$                                  |
| Final $R$ indexes [all data]                   | $R_1 = 0.1678, wR_2 = 0.2175$                                  |
| Largest diff. peak/hole / $e \text{\AA}^{-3}$  | 0.22/-0.35                                                     |

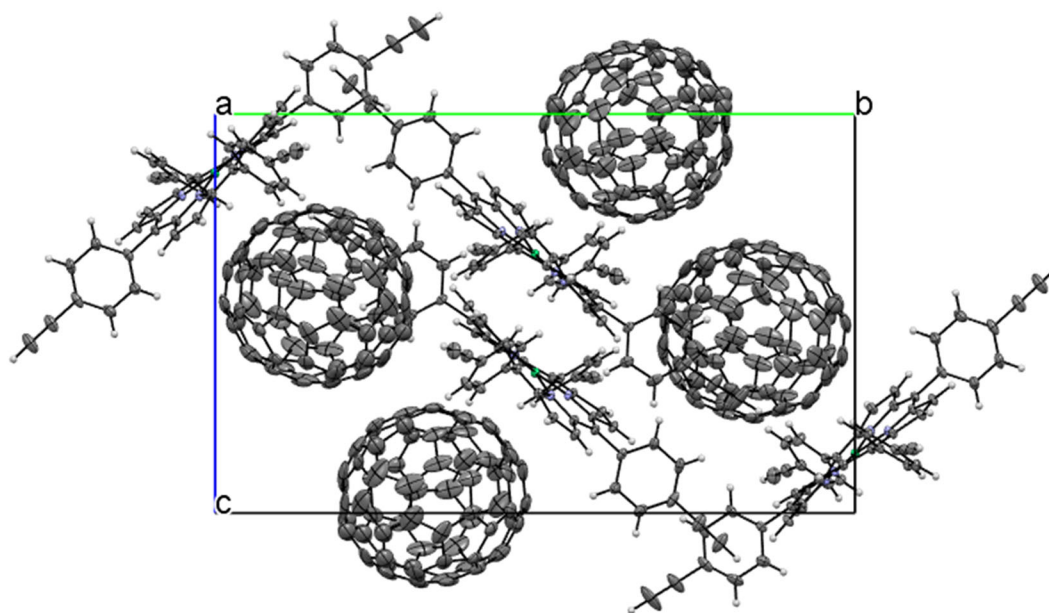

**Fig. S11.** Unit cell of NiTEPP/C<sub>70</sub>-n viewed along the *a* axis.

**Table S3.** Crystallographic data for NiTEPP/C<sub>70</sub>-n collected at 120 K

|                                                              |                                                                               |
|--------------------------------------------------------------|-------------------------------------------------------------------------------|
| Identification code                                          | NiTEPP/C <sub>70</sub> -n                                                     |
| Empirical formula                                            | C <sub>122</sub> H <sub>28</sub> N <sub>4</sub> Ni                            |
| Formula weight                                               | 1608.19                                                                       |
| Temperature/ K                                               | 120                                                                           |
| Crystal system                                               | monoclinic                                                                    |
| Space group                                                  | <i>P</i> 2 <sub>1</sub> / <i>n</i>                                            |
| <i>a</i> / Å                                                 | 16.6349(4)                                                                    |
| <i>b</i> / Å                                                 | 25.9091(5)                                                                    |
| <i>c</i> / Å                                                 | 17.1255(4)                                                                    |
| $\alpha$ / °                                                 | 90                                                                            |
| $\beta$ / °                                                  | 109.381(3)                                                                    |
| $\gamma$ / °                                                 | 90                                                                            |
| Volume / Å <sup>3</sup>                                      | 6962.7(3)                                                                     |
| <i>Z</i>                                                     | 4                                                                             |
| $\rho_{\text{calc}}$ g/cm <sup>3</sup>                       | 1.534                                                                         |
| $\mu$ / mm <sup>-1</sup>                                     | 0.349                                                                         |
| <i>F</i> (000)                                               | 3264.0                                                                        |
| Crystal size / mm <sup>3</sup>                               | 0.19 × 0.18 × 0.07                                                            |
| Radiation                                                    | Mo K $\alpha$ ( $\lambda$ = 0.71073)                                          |
| 2 $\theta$ range for data collection / °                     | 5.094 to 67.754                                                               |
| Index ranges                                                 | -25 ≤ <i>h</i> ≤ 21, -37 ≤ <i>k</i> ≤ 40, -26 ≤ <i>l</i> ≤ 23                 |
| Reflections collected                                        | 105290                                                                        |
| Independent reflections                                      | 25143 [ <i>R</i> <sub>int</sub> = 0.0477, <i>R</i> <sub>sigma</sub> = 0.0513] |
| Data/restraints/parameters                                   | 25143/0/1090                                                                  |
| Goodness-of-fit on <i>F</i> <sup>2</sup>                     | 1.018                                                                         |
| Final <i>R</i> indexes [ <i>I</i> ≥ 2 $\sigma$ ( <i>I</i> )] | <i>R</i> <sub>1</sub> = 0.1027, w <i>R</i> <sub>2</sub> = 0.2427              |
| Final <i>R</i> indexes [all data]                            | <i>R</i> <sub>1</sub> = 0.1383, w <i>R</i> <sub>2</sub> = 0.2670              |
| Largest diff. peak/hole / e Å <sup>-3</sup>                  | 2.10/-1.43                                                                    |

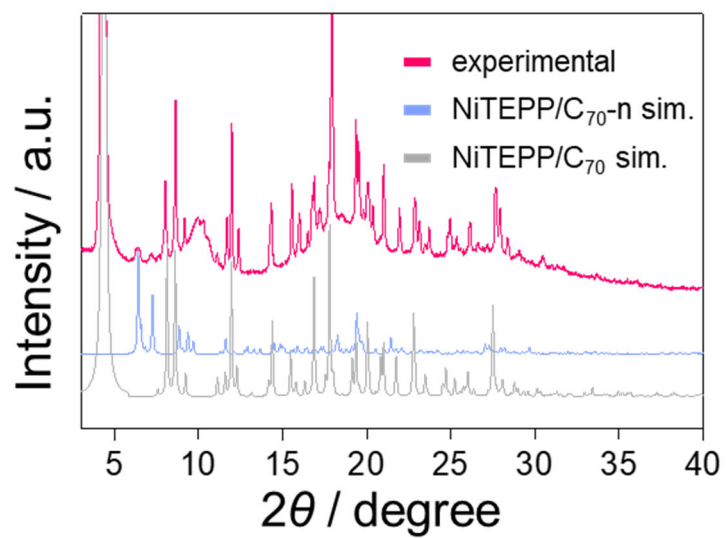

**Fig. S12** Experimental PXRD pattern of the bulk sample prepared by Fig. S1, and simulated ones from the NiTEPP/C<sub>70</sub>-n and NiTEPP/C<sub>70</sub> single crystal structures.

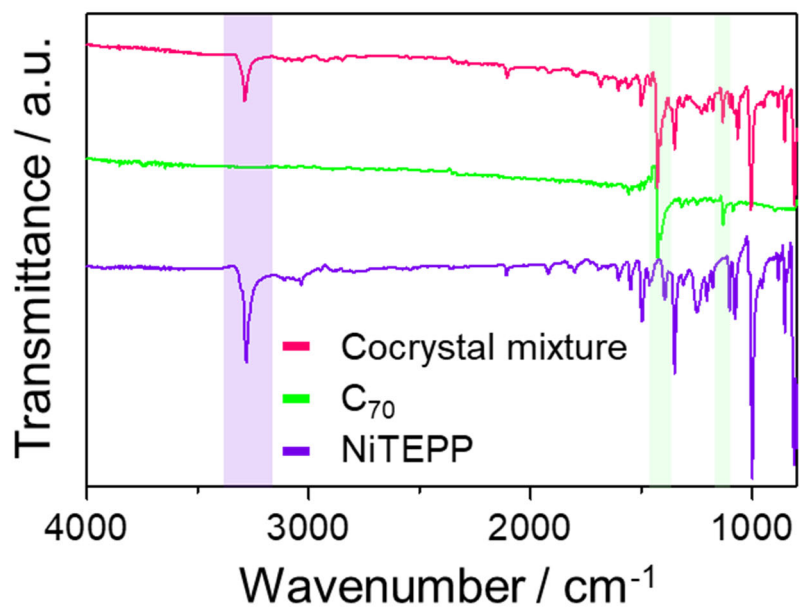

**Fig. S13.** IR spectra of cocystal mixture (magenta), C<sub>70</sub> (green), NiTEPP (purple).

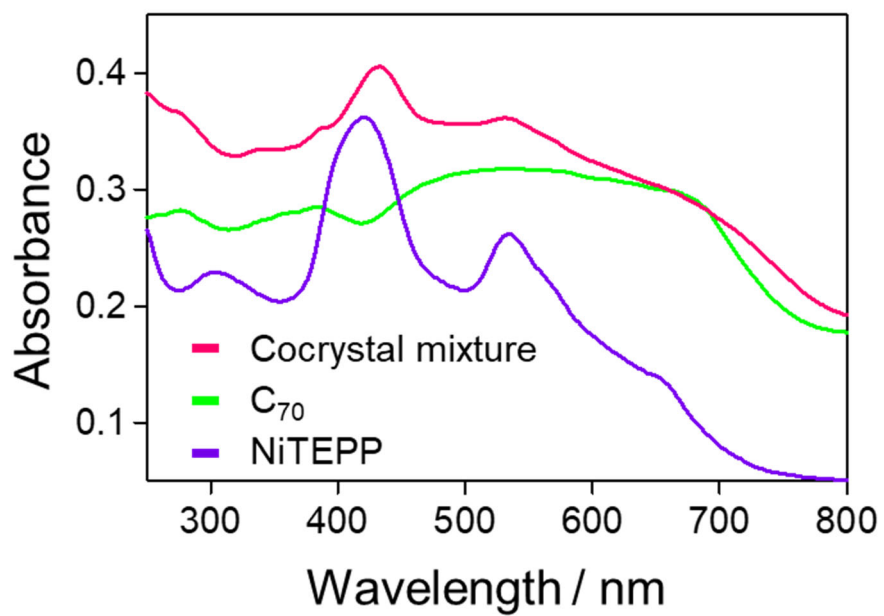

**Fig. S14** Solid-state UV/vis absorption spectra of cocystal mixture (magenta), C<sub>70</sub> (green), NiTEPP (purple).

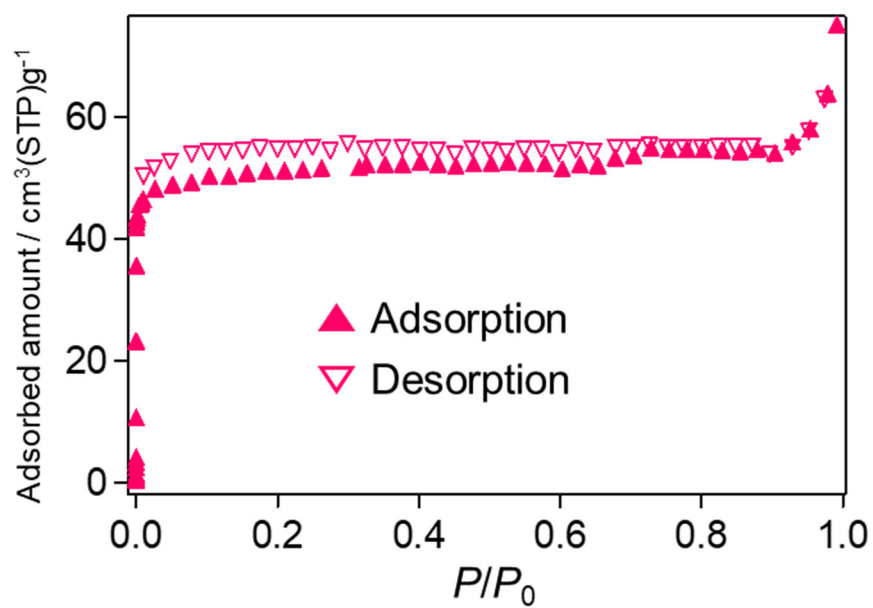

**Fig. S15.** Nitrogen adsorption/desorption isotherms of cocrystal mixture at 77 K.

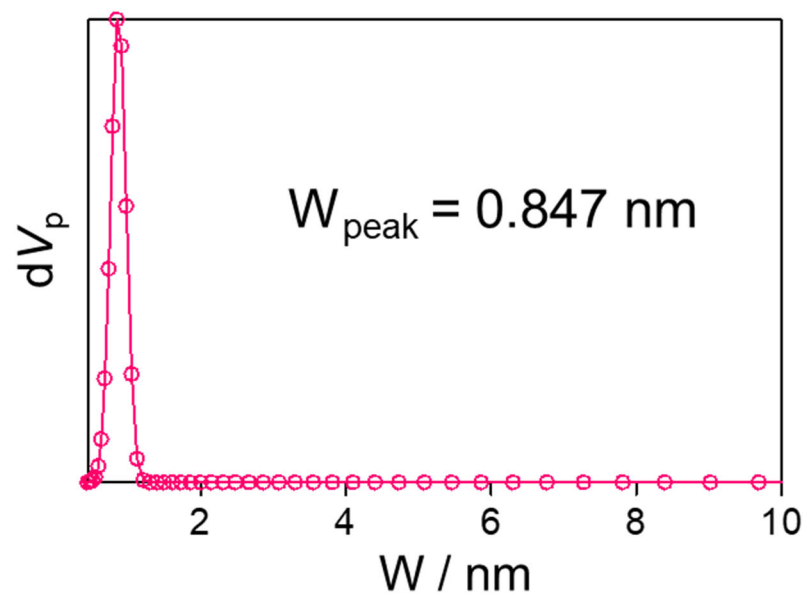

**Fig. S16.** Pore size distribution data obtained from the nitrogen adsorption isotherm of cocrystal mixture using the NLDFT-GCMC method.

**Table S4.** Cell parameters of NiTEPP/C<sub>70</sub> obtained from scXRD measurements under applied pressures

| Pressure (GPa) | <i>a</i> (Å) | <i>b</i> (Å) | <i>c</i> (Å) | $\alpha$ (degree) | $\beta$ (degree) | $\gamma$ (degree) | <i>V</i> (Å <sup>3</sup> ) | Rate of match to detected cell (%) |
|----------------|--------------|--------------|--------------|-------------------|------------------|-------------------|----------------------------|------------------------------------|
| 0              | 23.67        | 23.66        | 21.58        | 90.01             | 90.00            | 120.0             | 10466                      | 95.25                              |
| 0.06           | 23.58        | 23.60        | 21.50        | 90.01             | 90.03            | 119.5             | 10406                      | 70.33                              |
| 0.32           | 23.36        | 23.28        | 21.26        | 90.04             | 90.07            | 119.4             | 10075                      | 72.57                              |
| 0.60           | 23.037       | 23.113       | 21.116       | 90.04             | 89.97            | 119.59            | 9777                       | 81.54                              |
| 1.35           | 23.3565      | 23.069       | 20.069       | 90.3456           | 89.4408          | 121.3411          | 9603.18                    | 7.69                               |
| 1.92           | 24.0022      | 23.6402      | 20.6182      | 92.4838           | 83.7445          | 130.5201          | 8834.6038                  | 6.25                               |

**Table S5.** Cell parameters of NiTEPP/C<sub>70-n</sub> obtained from scXRD measurements under applied pressure

| Pressure (GPa) | <i>a</i> (Å) | <i>b</i> (Å) | <i>c</i> (Å) | $\alpha$ (degree) | $\beta$ (degree) | $\gamma$ (degree) | <i>V</i> (Å <sup>3</sup> ) | Ratio of match to detected cell (%) |
|----------------|--------------|--------------|--------------|-------------------|------------------|-------------------|----------------------------|-------------------------------------|
| 0              | 16.628       | 26.9152      | 16.8575      | 89.999            | 107.824          | 89.981            | 7182.6                     | 84.55                               |
| 0.07           | 16.6292      | 26.9032      | 16.856       | 89.992            | 107.838          | 90.001            | 7179                       | 96.47                               |
| 0.60           | 16.67        | 24.95        | 16.76        | 89.99             | 108.42           | 90.01             | 6604                       | 92.8                                |
| 1.50           | 16.44        | 24.59        | 16.53        | 89.71             | 108.9            | 89.75             | 6324                       | 87.64                               |
| 2.17           | 16.81        | 25.57        | 16.76        | 89.76             | 113.78           | 89.68             | 6592                       | 50.71                               |
| 3.60           | 16.51        | 24.89        | 16.69        | 89.82             | 110.9            | 90.1              | 6408                       | 61.48                               |
| 5.70           | 16.41        | 25.25        | 17.7         | 90.9              | 111              | 90.6              | 6828                       | 17.14                               |

## References for SI

- (1) CrysAlisPRO, Oxford Diffraction /Agilent Technologies UK Ltd, Yarnton, England.
- (2) VandeVondele, J.; Krack, M.; Mohamed, F.; Parrinello, M.; Chassaing, T.; Hutter, J. Quickstep: Fast and Accurate Density Functional Calculations Using a Mixed Gaussian and Plane Waves Approach. *Comput. Phys. Commun.* **2005**, *167* (2), 103–128. <https://doi.org/10.1016/j.cpc.2004.12.014>.
- (3) Kühne, T. D.; Iannuzzi, M.; Del Ben, M.; Rybkin, V. V.; Seewald, P.; Stein, F.; Laino, T.; Khaliullin, R. Z.; Schütt, O.; Schiffmann, F.; Golze, D.; Wilhelm, J.; Chulkov, S.; Bani-Hashemian, M. H.; Weber, V.; Borštnik, U.; Taillefumier, M.; Jakobovits, A. S.; Lazzaro, A.; Pabst, H.; Müller, T.; Schade, R.; Guidon, M.; Andermatt, S.; Holmberg, N.; Schenter, G. K.; Hehn, A.; Bussy, A.; Belleflamme, F.; Tabacchi, G.; Glöß, A.; Lass, M.; Bethune, I.; Mundy, C. J.; Plessl, C.; Watkins, M.; VandeVondele, J.; Krack, M.; Hutter, J. CP2K: An Electronic Structure and Molecular Dynamics Software Package - Quickstep: Efficient and Accurate Electronic Structure Calculations. *J. Chem. Phys.* **2020**, *152* (19). <https://doi.org/10.1063/5.0007045>.
- (4) Perdew, J. P.; Burke, K.; Ernzerhof, M. Generalized Gradient Approximation Made Simple. *Phys. Rev. Lett.* **1996**, *77* (18), 3865–3868. <https://doi.org/10.1103/PhysRevLett.77.3865>.
- (5) VandeVondele, J.; Hutter, J. Gaussian Basis Sets for Accurate Calculations on Molecular Systems in Gas and Condensed Phases. *J. Chem. Phys.* **2007**, *127* (11), 114105. <https://doi.org/10.1063/1.2770708>.
- (6) Hartwigsen, C.; Goedecker, S.; Hutter, J. Relativistic Separable Dual-Space Gaussian Pseudopotentials from H to Rn. *Phys. Rev. B* **1998**, *58* (7), 3641–3662. <https://doi.org/10.1103/PhysRevB.58.3641>.
- (7) Huang, C.; Pavone, M.; Carter, E. A. Quantum Mechanical Embedding Theory Based on a Unique Embedding Potential. *J. Chem. Phys.* **2011**, *134* (15), 154110. <https://doi.org/10.1063/1.3577516>.
- (8) Makiura, R.; Usui, R.; Sakai, Y.; Nomoto, A.; Ogawa, A.; Sakata, O.; Fujiwara, A. Towards Rational Modulation of In-Plane Molecular Arrangements in Metal–Organic Framework Nanosheets. *ChemPlusChem* **2014**, *79* (9), 1352–1360. <https://doi.org/10.1002/cplu.201402150>.
- (9) Vonhoeren, B.; Dalglish, S.; Hu, L.; Matsushita, M. M.; Awaga, K.; Ravoo, B. J. Photocurrent Generation in Organic Photodetectors with Tailor-Made Active Layers Fabricated by Layer-by-Layer Deposition. *ACS Appl. Mater. Interfaces* **2015**, *7* (13), 7049–7053. <https://doi.org/10.1021/am509031u>.
- (10) Wang, Z.; Yuan, S.; Mason, A.; Repogle, B.; Liu, D.-J.; Yu, L. Nanoporous Porphyrin Polymers for Gas Storage and Separation. *Macromolecules* **2012**, *45* (18), 7413–7419. <https://doi.org/10.1021/ma301426e>.
- (11) Bondi, A. Van Der Waals Volumes and Radii. *J. Phys. Chem.* **1964**, *68* (3), 441–451.

<https://doi.org/10.1021/j100785a001>.
